# Supplementary material for: Cluster-randomised trial to evaluate the ‘Change for Life’ mass media/ social marketing campaign in the UK
Source: PubMed Central journal article supplement (PMC3541256; doi:10.1186/1471-2458-12-404), 2012-06-06
Supplement: 1471-2458-12-404-S1.pdf [file 1471-2458-12-404-S1.pdf]

Supplemental Table: outcome measures used in the study questionnaire

| Outcome measures used in evaluation study                                                                                                                                                                                                                                                                                                                                                                                                       | Response options                                                                                                                                                                  | Scoring and interpretation                                                                                                                                  |
|-------------------------------------------------------------------------------------------------------------------------------------------------------------------------------------------------------------------------------------------------------------------------------------------------------------------------------------------------------------------------------------------------------------------------------------------------|-----------------------------------------------------------------------------------------------------------------------------------------------------------------------------------|-------------------------------------------------------------------------------------------------------------------------------------------------------------|
| <b>Parent attitudes and intention to change child behaviours</b>                                                                                                                                                                                                                                                                                                                                                                                |                                                                                                                                                                                   |                                                                                                                                                             |
| Rating of importance/ ease/ intention to change <sup>1</sup> :<br>Limit high-fat foods eaten at mealtimes<br>Limit number of sugary drinks<br>Avoid sugary breakfast cereals<br>Snack mainly on healthy foods<br>Not to eat too much food<br>Eat 5 or more portions of fruit and vegetables<br>Eat 3 meals at regular times<br>Eat no more than 2 snacks<br>Spend at least 60 minutes being active<br>Limit time spent watching TV/ on computer | Each item on a five-point Likert scale ('not important' to 'very important'; 'difficult' to 'easy'; 'definitely do not intend to do' to 'definitely intend to do')                | Each item had a possible score of 1-5, a higher score indicated greater importance, ease and rating of intention to change                                  |
| <b>Child behaviour</b>                                                                                                                                                                                                                                                                                                                                                                                                                          |                                                                                                                                                                                   |                                                                                                                                                             |
| Intake of <sup>1</sup> :<br>Snacks<br>Sugary drinks<br>Fruits<br>Vegetables                                                                                                                                                                                                                                                                                                                                                                     | Frequency that child typically has each food and drink ('less than once a week', '1 a week', '2-3 times a week', '4-6 times a week', '1 a day', '2 a day', and '3 or more a day') | Each item had a possible score of 1 to 7, mean score calculated to create an overall healthy eating score (snack and sugary drink items reversed). A higher |

|                                                                                                                                                                                                       |                                                                                                                                                                               |                                                                         |
|-------------------------------------------------------------------------------------------------------------------------------------------------------------------------------------------------------|-------------------------------------------------------------------------------------------------------------------------------------------------------------------------------|-------------------------------------------------------------------------|
|                                                                                                                                                                                                       |                                                                                                                                                                               | score indicated healthier eating.                                       |
| Number of days child is physically active for at least 60 minutes in a typical week <sup>1</sup><br>(This did not need to be in one go and a definition of physical activity with examples was given) | Number of days child is active ('less than 1 day a week', '1 day a week', '2 days a week', '3 days a week', '4 days a week', '5 days a week', and '6 or more days a week').   | For analysis, an average of the daily hours of activity was calculated. |
| Hours of TV/ video/ computer on a typical weekday/ weekend day (including evenings) <sup>1</sup>                                                                                                      | Media viewing in a typical weekday and weekend day ('none', less than 1 hour a day', '1-2 hours a day', '2-3 hours a day', '3-4 hours a day', and 'more than 4 hours a day'). | For analysis, an average of the daily hours of viewing was calculated.  |
| <b>Parent behaviour</b>                                                                                                                                                                               |                                                                                                                                                                               |                                                                         |
| Monitoring of food intake <sup>2</sup> :<br>Snack foods (e.g. crisps, cheesy crackers)<br>High fat foods<br>Sweet things (e.g. sweets, ice-cream, cake, biscuits, chocolate)                          | Frequency that parent keep track of each food type ('never', 'rarely', 'sometimes', 'often', and 'always').                                                                   | A higher mean score indicated more monitoring.                          |
| Modelling healthy eating by <sup>3</sup> :<br>Eating healthy foods<br>Eating healthy foods in front of child even if not favourite                                                                    | Parents' agreement over doing each behaviour ('disagree', 'slightly disagree', 'slightly agree', and 'agree').                                                                | A higher mean score indicated more modelling.                           |

|                                                                                                                                                                                                    |                                                                                                                                 |                                               |
|----------------------------------------------------------------------------------------------------------------------------------------------------------------------------------------------------|---------------------------------------------------------------------------------------------------------------------------------|-----------------------------------------------|
| Showing enthusiasm about healthy foods<br>Showing how much enjoy healthy foods                                                                                                                     |                                                                                                                                 |                                               |
| Monitoring of physical activity <sup>4</sup>                                                                                                                                                       | Frequency that parent tracks how much physical activity child does ('never', 'rarely', 'sometimes', 'often', and 'very often'). | A higher score indicated more monitoring      |
| Modelling of being active <sup>5</sup> :<br>Being active<br>Being active in front of child even if prefer not to<br>Showing enthusiasm about being active<br>Showing how much I enjoy being active | Parents' agreement over doing each behaviour ('disagree', 'slightly disagree', 'slightly agree', and 'agree').                  | A higher mean score indicated more modelling. |

<sup>1</sup>Questions developed for study; <sup>2</sup>Taken from the Child Feeding questionnaire (Birch et al, 01); <sup>3</sup>Taken from the 'Comprehensive Feeding Practices Questionnaire' (Musher-Eizenman & Holub, 07); <sup>4</sup>Adapted from the PACE physical activity measure for adolescents (PACE, 01); <sup>5</sup>Adapted for physical activity from the 'Comprehensive Feeding Practices Questionnaire' (Musher-Eizenman & Holub, 07)
